# Supplementary material
Source: PubMed Central journal article supplement (PMC4440516)
Supplement: NIHMS689592-supplement-Supplementary_materials.pdf [file NIHMS689592-supplement-Supplementary_materials.pdf]

# Coulombic Free Energy and Salt Ion Association Per Phosphate of All-atom Models of DNA Oligomer: Dependence on Oligomer Size

Irina A. Shkel,\* and M.Thomas Record, Jr.

*Departments of Biochemistry and Chemistry, University of Wisconsin-Madison, Madison,  
Wisconsin 53706*

## Supplementary Information

**All-atom NLPB calculation details.** Table S1 shows grid dimension and sizes for all three all-atom model. Amber force field<sup>1</sup> was used to generate atomic charges and radii. Other parameters used in calculations are: nonlinear PBE; multiple Debye-Huckel sphere boundary conditions, 2.0 Å mobile ion radius, solute dielectric constant 2.0, solvent dielectric constant 78.54, "molecular" surface definition, harmonic average smoothing, solvent probe radius 1.4 Å, temperature 298.15 °K.

**Table S1. Grid Sizes and Spacings for All-atom NLPB Calculations**

| File/Model    | Grid dimensions | Grid spacings before focusing (Å/grid) <sup>3</sup> | Grid lengths before focusing Å <sup>3</sup> | Grid spacings after focusing (Å/grid) <sup>3</sup> | Grid lengths after focusing Å <sup>3</sup> |
|---------------|-----------------|-----------------------------------------------------|---------------------------------------------|----------------------------------------------------|--------------------------------------------|
| CGATTAGATAGC  | 129x129x193     | 0.625x0.625x0.547                                   | 80x80x105                                   | 0.391x0.391x0.391                                  | 50x50x75                                   |
| 1DUF and 1CS2 | 97x97x129       | 0.833x0.833x0.938                                   | 80x80x120                                   | 0.573x0.573x0.547                                  | 55x55x70                                   |

## References

- (1) D.A. Case, T.E. Cheatham, III, T. Darden, H. Gohlke, R. Luo, K.M. Merz, Jr., A. Onufriev, C. Simmerling, B. Wang and R. Woods, The Amber biomolecular simulation programs. *J. Computat. Chem.*, **2005**, *26*, 1668-1688 .
